# Supplementary material
Source: PubMed Central journal article supplement (PMC6482847)
Supplement: NIHMS1008448-supplement-Supp_info.pdf [file NIHMS1008448-supplement-Supp_info.pdf]

## SUPPLEMENTARY MATERIAL

*Agrobacterium tumefaciens* divisome proteins regulate the transition from polar growth to cell division

Matthew Howell<sup>1</sup>, Alena Aliashkevich<sup>2</sup>, Kousik Sundararajan<sup>3\*</sup>, Jeremy J. Daniel<sup>1</sup>,  
Patrick J. Lariviere<sup>3</sup>, Erin D. Goley<sup>3</sup>, Felipe Cava<sup>2</sup>, and Pamela J.B. Brown<sup>1#</sup>

<sup>1</sup>Division of Biological Sciences, University of Missouri, Columbia, MO, 65203

<sup>2</sup>Department of Molecular Biology. Laboratory for Molecular Infection Medicine Sweden (MIMS), Umeå Centre for Microbial Research, Umeå University, Umeå, Sweden

<sup>3</sup>Department of Biological Chemistry, Johns Hopkins University School of Medicine, Baltimore, MD 21205

\*Present address Department of Biochemistry, Stanford University School of Medicine, Stanford, CA 94305

#Address correspondence to Pamela J.B. Brown, [brownpb@missouri.edu](mailto:brownpb@missouri.edu)

- 1) SUPPLEMENTAL TABLES S1 and S2**
- 2) SUPPLEMENTAL FIGURES AND LEGENDS S1 and S2**
- 3) SUPPLEMENTAL MOVIE LEGENDS**
- 4) SUPPLEMENTAL REFERENCES**

## 1) SUPPLEMENTARY TABLES

**Table S1.** Bacterial strains and plasmids used in this study.

| Strain or plasmid                      | Relevant characteristics                                                                                                                | Reference/ Source                      |
|----------------------------------------|-----------------------------------------------------------------------------------------------------------------------------------------|----------------------------------------|
| <i>Source Plasmids</i>                 |                                                                                                                                         |                                        |
| pSRKKm-Plac                            | Km <sup>r</sup> ; broad host range vector containing <i>lacI<sup>q</sup></i> and lac promoter                                           | (Khan <i>et al.</i> , 2008)            |
| pSRKKm-Plac-sfgfp                      | pSRKKm vector containing <i>lacI<sup>q</sup></i> and lac promoter with sfGFP                                                            | (Figueroa-Cuilan <i>et al.</i> , 2016) |
| pRVMCS-2                               | Km <sup>r</sup> ; vector containing vanillate promoter which provides low constitutive expression in <i>A. tumefaciens</i>              | (Thanbichler <i>et al.</i> , 2007)     |
| pMR10                                  | Km <sup>r</sup> ; mini-RK2 vector; constitutive expression                                                                              | Brun Lab                               |
| pNTPS139                               | Km <sup>r</sup> ; Suicide vector containing <i>oriT</i> and <i>sacB</i>                                                                 | D. Alley                               |
| pUC18-mini-Tn7T-GM-LAC                 | Ap <sup>r</sup> Gm <sup>r</sup> ; mini-Tn7 vector containing <i>lacI<sup>q</sup></i> and tac promoter                                   | (Choi <i>et al.</i> , 2010)            |
| pUC18-mini-Tn7T-GM-Plac                | Ap <sup>r</sup> Gm <sup>r</sup> ; mini-Tn7 vector containing <i>lacI<sup>q</sup></i> and lac promoter                                   | (Figueroa-Cuilan <i>et al.</i> , 2016) |
| pTNS3                                  | Ap <sup>r</sup> ; helper plasmid encoding the site-specific TnsABCD Tn7 transposition pathway                                           | (Choi <i>et al.</i> , 2010)            |
| pET21a                                 | Ap <sup>r</sup> ; plasmid for IPTG-inducible expression in <i>E. coli</i> for protein overproduction                                    | Novagen                                |
| pET21c                                 | Ap <sup>r</sup> ; plasmid for IPTG-inducible expression in <i>E. coli</i> for protein overproduction                                    | Novagen                                |
| pTB146                                 | Ap <sup>r</sup> ; plasmid for IPTG-inducible expression in <i>E. coli</i> for overproduction of His <sub>6</sub> -SUMO protein fusions  | (Bendezu <i>et al.</i> , 2009)         |
| pXCFPN-1                               | Sp <sup>r</sup> ; integrating plasmid for xylose-inducible expression of N-terminal CFP fusions in <i>Caulobacter crescentus</i>        | (Thanbichler <i>et al.</i> , 2007)     |
| <i>Replicating plasmids</i>            |                                                                                                                                         |                                        |
| pRV- <i>ftsZAT</i> -sfgfp              | Km <sup>r</sup> ; Constitutive expression of <i>ftsZAT</i> -sfgfp                                                                       | (Howell <i>et al.</i> , 2017)          |
| pRV- <i>ftsZ1</i> -sfgfp               | Km <sup>r</sup> ; Constitutive expression of <i>ftsZ1</i> -sfgfp                                                                        | This Study                             |
| pRV- <i>ftsZ3</i> -sfgfp               | Km <sup>r</sup> ; Constitutive expression of <i>ftsZ3</i> -sfgfp                                                                        | This Study                             |
| pSRKKM-Pqaz- <i>ftsA</i> -sfgfp        | Km <sup>r</sup> ; vector containing <i>A. tumefaciens</i> native <i>ftsQAZ</i> promoter followed by <i>ftsA</i> -sfGFP coding sequence. | (Howell <i>et al.</i> , 2017)          |
| pMR10-PpopZ- <i>popZ-yfp</i>           | pMR10 vector containing <i>popZ-yfp</i> under control of the native promoter                                                            | Brun Lab                               |
| pRV- <i>ldtp0845</i> -sfgfp            | Km <sup>r</sup> ; Constitutive expression of <i>ldtp0845</i> -sfgfp                                                                     | This Study                             |
| <i>Deletion plasmids</i>               |                                                                                                                                         |                                        |
| pNTPS139Δ <i>ftsZAT</i>                | Km <sup>r</sup> Suc <sup>s</sup> ; deletion plasmid for <i>ftsZAT</i>                                                                   | This Study                             |
| pNTPS139Δ <i>ftsZ1</i>                 | Km <sup>r</sup> Suc <sup>s</sup> ; deletion plasmid for <i>ftsZ1</i>                                                                    | This Study                             |
| pNTPS139Δ <i>ftsZ3</i>                 | Km <sup>r</sup> Suc <sup>s</sup> ; deletion plasmid for <i>ftsZ3</i>                                                                    | This Study                             |
| pNTPS139Δ <i>ftsA</i>                  | Km <sup>r</sup> Suc <sup>s</sup> ; deletion plasmid for <i>ftsA</i>                                                                     | This Study                             |
| pNTPS139Δ <i>ftsW</i>                  | Km <sup>r</sup> Suc <sup>s</sup> ; deletion plasmid for <i>ftsW</i>                                                                     | This Study                             |
| <i>Depletion plasmids</i>              |                                                                                                                                         |                                        |
| pUC18-mini-Tn7T-GM-LAC <i>ftsZAT</i>   | Ap <sup>r</sup> Gm <sup>r</sup> ; mini-Tn7 vector containing <i>ftsZAT</i> under control of the tac promoter                            | This Study                             |
| pUC18-mini-Tn7T-GM-Plac <i>ftsA</i>    | Ap <sup>r</sup> Gm <sup>r</sup> ; mini-Tn7 vector containing <i>ftsA</i> under control of the lac promoter                              | This Study                             |
| pUC18-mini-Tn7T-GM-Plac <i>ftsW</i>    | Ap <sup>r</sup> Gm <sup>r</sup> ; mini-Tn7 vector containing <i>ftsW</i> under control of the lac promoter                              | This Study                             |
| <i>Plasmids for protein production</i> |                                                                                                                                         |                                        |
| pET21a FtsZAT (pEG1555)                | Ap <sup>r</sup> ; plasmid for overproduction of FtsZAT in <i>E. coli</i> under control of the T7 promoter and lac operator              | This Study                             |

|                                                                                        |                                                                                                                                                                                        |                                       |
|----------------------------------------------------------------------------------------|----------------------------------------------------------------------------------------------------------------------------------------------------------------------------------------|---------------------------------------|
| pET21a FtsZ <sub>AT</sub> -L72W (pEG1556)                                              | Ap <sup>r</sup> ; plasmid for overproduction of FtsZ <sub>AT</sub> -L72W in <i>E. coli</i> under control of the T7 promoter and lac operator                                           | This Study                            |
| pTB146 FtsZ <sub>1</sub> (pEG1535)                                                     | Ap <sup>r</sup> ; plasmid for overproduction of His <sub>6</sub> -SUMO-FtsZ <sub>1</sub> in <i>E. coli</i> under control of the T7 promoter and lac operator                           | This Study                            |
| pTB146 FtsZ <sub>1</sub> -L71W (pEG1542)                                               | Ap <sup>r</sup> ; plasmid for overproduction of His <sub>6</sub> -SUMO-FtsZ <sub>1</sub> -L71W in <i>E. coli</i> under control of the T7 promoter and lac operator                     | This Study                            |
| <i>E. coli</i> strains                                                                 |                                                                                                                                                                                        |                                       |
| DH5α                                                                                   | Cloning strain                                                                                                                                                                         | Life Technologies                     |
| S17-1                                                                                  | Smr;RP4-2 TC::MU Km-Tn7; for plasmid mobilization                                                                                                                                      | (Simon <i>et al.</i> , 1983)          |
| NEB Turbo                                                                              | Cloning strain                                                                                                                                                                         | New England Biolabs                   |
| Rosetta(DE3)pLysS                                                                      | Strain for protein overproduction                                                                                                                                                      | Novagen                               |
| <i>A. tumefaciens</i> strains                                                          |                                                                                                                                                                                        |                                       |
| C58                                                                                    | Nopaline type strain; pTiC58; pAtC58                                                                                                                                                   | (Watson <i>et al.</i> , 1975)         |
| C58ΔtetRA::a-attTn7                                                                    | Replacement of the <i>tetRA</i> locus with an artificial <i>attTn7</i> site                                                                                                            | (Figuroa-Cuilan <i>et al.</i> , 2016) |
| C58ΔtetRA::a-attTn7 pRV-ftsZ <sub>AT</sub> -sfGFP                                      | C58ΔtetRA::a-attTn7 with pRV expression FtsZ <sub>AT</sub> -sfGFP constitutively                                                                                                       | This Study                            |
| C58ΔtetRA::a-attTn7 pRV-ftsZ <sub>1</sub> -sfGFP                                       | C58ΔtetRA::a-attTn7 with pRV expression FtsZ <sub>1</sub> -sfGFP constitutively                                                                                                        | This Study                            |
| C58ΔtetRA::a-attTn7 pRV-ftsZ <sub>3</sub> -sfGFP                                       | C58ΔtetRA::a-attTn7 with pRV expression FtsZ <sub>3</sub> -sfGFP constitutively                                                                                                        | This Study                            |
| C58ΔtetRA::a-attTn7 ΔftsZ <sub>1</sub>                                                 | ΔftsZ <sub>1</sub>                                                                                                                                                                     | This Study                            |
| C58ΔtetRA::a-attTn7 ΔftsZ <sub>3</sub>                                                 | ΔftsZ <sub>3</sub>                                                                                                                                                                     | This Study                            |
| C58ΔtetRA::a-attTn7 ΔftsZ <sub>1</sub> ΔftsZ <sub>3</sub>                              | ΔftsZ <sub>1</sub> ΔftsZ <sub>3</sub>                                                                                                                                                  | This Study                            |
| C58ΔtetRA::mini-Tn7-GM-Ptac-ftsZ <sub>AT</sub>                                         | Mini-Tn7T-GM-Ptac-ftsZ <sub>AT</sub> inserted into a-attTn7 site                                                                                                                       | This Study                            |
| C58ΔtetRA::mini-Tn7-GM-Ptac-ftsZ <sub>AT</sub> , ΔftsZ <sub>AT</sub>                   | Chromosome-based complementation of ΔftsZ <sub>AT</sub> with C58ΔtetRA::mini-Tn7-GM-Ptac-ftsZ <sub>AT</sub> allowing depletion of FtsZ <sub>AT</sub> under control of the tac promoter | This Study                            |
| C58ΔtetRA::mini-Tn7-GM-Ptac-ftsZ <sub>AT</sub> , ΔftsZ <sub>1</sub>                    | FtsZ <sub>AT</sub> depletion background; ΔftsZ <sub>1</sub>                                                                                                                            | This Study                            |
| C58ΔtetRA::mini-Tn7-GM-Ptac-ftsZ <sub>AT</sub> , ΔftsZ <sub>3</sub>                    | FtsZ <sub>AT</sub> depletion background; ΔftsZ <sub>3</sub>                                                                                                                            | This Study                            |
| C58ΔtetRA::mini-Tn7-GM-Ptac-ftsZ <sub>AT</sub> , ΔftsZ <sub>1</sub> ΔftsZ <sub>3</sub> | FtsZ <sub>AT</sub> depletion background; ΔftsZ <sub>1</sub> ΔftsZ <sub>3</sub>                                                                                                         | This Study                            |
| C58ΔtetRA::mini-Tn7-GM-Ptac-ftsZ <sub>AT</sub> ; pRV-ftsZ <sub>1</sub> -sfGFP          | FtsZ <sub>AT</sub> depletion background with pRV constitutive expression of FtsZ <sub>1</sub> -sfGFP                                                                                   | This Study                            |
| C58ΔtetRA::a-attTn7; pSRKKm Pqaz-ftsA-sfGFP                                            | constitutive expression of FtsA-sfGFP from Pqaz                                                                                                                                        | This study                            |
| C58ΔtetRA::mini-Tn7-GM-Ptac-ftsZ <sub>AT</sub> ; pSRKKm Pqaz-ftsA-sfGFP                | FtsZ <sub>AT</sub> depletion background with constitutive expression of FtsA-sfGFP from Pqaz                                                                                           | This Study                            |
| C58ΔtetRA::a-attTn7; pSRKKm PpopZ-popZ-                                                | constitutive expression of PopZ-YFP from native promoter                                                                                                                               | This study                            |

|                                                                                                |                                                                                                                                                              |            |
|------------------------------------------------------------------------------------------------|--------------------------------------------------------------------------------------------------------------------------------------------------------------|------------|
| <i>yfp</i>                                                                                     |                                                                                                                                                              |            |
| C58ΔtetRA::mini-Tn7-GM-Ptac- <i>ftsZ<sub>AT</sub></i> ; pSRKKM PpopZ- <i>popZ-yfp</i>          | FtsZ <sub>AT</sub> depletion background with constitutive expression of PopZ-YFP from native promoter                                                        | This Study |
| C58ΔtetRA::a- <i>att</i> Tn7 pRV- <i>ldtp<sub>0845</sub>-sfgfp</i>                             | C58ΔtetRA::a- <i>att</i> Tn7 with pRV constitutive expression of LDTP <sub>0845</sub> -sfGFP                                                                 | This Study |
| C58ΔtetRA::mini-Tn7-GM-Ptac- <i>ftsZ<sub>AT</sub></i> ; pRV- <i>ldtp<sub>0845</sub>-sfgfp</i>  | FtsZ <sub>AT</sub> depletion background with pRV constitutive expression of LDTP <sub>0845</sub> -sfGFP                                                      | This Study |
| C58ΔtetRA::mini-Tn7-GM-Plac- <i>ftsA</i>                                                       | Mini-Tn7T-GM-Plac- <i>ftsA</i> inserted into a- <i>att</i> Tn7 site                                                                                          | This Study |
| C58ΔtetRA::mini-Tn7-GM-Plac- <i>ftsA</i> , Δ <i>ftsA</i>                                       | Chromosome-based complementation of Δ <i>ftsA</i> with C58ΔtetRA::mini-Tn7-GM-Plac- <i>ftsA</i> allowing depletion of FtsA under control of the lac promoter | This Study |
| C58ΔtetRA::mini-Tn7-GM-Plac- <i>ftsA</i> , Δ <i>ftsA</i> ; pSRKKM PpopZ- <i>popZ-sfgfp</i>     | FtsA depletion background with constitutive expression of PopZ-sfGFP                                                                                         | This Study |
| C58ΔtetRA::mini-Tn7-GM-Plac- <i>ftsA</i> , Δ <i>ftsA</i> ; pRV- <i>ftsZ<sub>AT</sub>-sfGFP</i> | FtsA depletion background with constitutive expression of FtsZ <sub>AT</sub> -sfGFP                                                                          | This Study |
| C58ΔtetRA::mini-Tn7-GM-Plac- <i>ftsW</i>                                                       | Mini-Tn7T-GM-Plac- <i>ftsW</i> inserted into a- <i>att</i> Tn7 site                                                                                          | This Study |
| C58ΔtetRA::mini-Tn7-GM-Plac- <i>ftsW</i> , Δ <i>ftsW</i>                                       | Chromosome-based complementation of Δ <i>ftsW</i> with C58ΔtetRA::mini-Tn7-GM-Plac- <i>ftsW</i> allowing depletion of FtsW under control of the lac promoter | This Study |
| C58ΔtetRA::mini-Tn7-GM-Plac- <i>ftsW</i> , Δ <i>ftsW</i> ; pSRKKM PpopZ- <i>popZ-sfgfp</i>     | FtsW depletion background with constitutive expression of PopZ-sfGFP                                                                                         | This Study |
| C58ΔtetRA::mini-Tn7-GM-Plac- <i>ftsW</i> , Δ <i>ftsW</i> ; pRV- <i>ftsZ<sub>AT</sub>-sfGFP</i> | FtsW depletion background with constitutive expression of FtsZ <sub>AT</sub> -sfGFP                                                                          | This Study |

**Table S2.** Synthesized DNA primers and gene fragments used in this study.

| Synthesized DNA                                               | Sequence (5' – 3')                              |
|---------------------------------------------------------------|-------------------------------------------------|
| <i>Primers for gene amplification</i>                         |                                                 |
| FtsZ <sub>AT</sub> For NdeI                                   | CGA CGC CAT ATG ACG ATA CAG CTG C               |
| FtsZ <sub>AT</sub> Rev BamHI for <i>gfp</i> fusion            | GCG TGA GGA TCC GTT GGA CTGGCG GCG C            |
| FtsZ <sub>AT</sub> Rev BamHI stop codon                       | CGG CAC GGA TCC TTA GTT GGA CTG GC              |
| FtsZ $\Delta$ CTP Rev NheI                                    | GCT AGC TTA GTG ATG GCT GGA CGA GGA AAG         |
| FtsZ <sub>i</sub> For NdeI                                    | GCA CGT CAT ATG ACC CAG TCT CCG CGC GCC         |
| FtsZ <sub>i</sub> Rev BamHI for <i>gfp</i> fusion             | GCA CGT GGA TCC GTT ACG CAA GCC GGT GGC CAC     |
| FtsZ <sub>i</sub> Rev BamHI stop codon                        | GCA CGT GGA TCC TCA GTT ACG CAA GCC GGT GGC CAC |
| FtsZ <sub>i</sub> For AseI                                    | GCA CGT ATT AAT ATG AAA CCA ACA ATG GCC ACA     |
| FtsZ <sub>i</sub> Rev BamHI for <i>gfp</i> fusion             | GCA CGT GGA TCC TGT CGG CTC CGC GTT CTC AA      |
| FtsZ <sub>i</sub> Rev BamHI stop codon                        | GCA CGT GGA TCC TCA TGT CGG CTC CGC GTT CTC AA  |
| FtsA For NdeI                                                 | CGA CGC CAT ATG AGC TTT TTT GGT TC              |
| FtsA Rev BamHI                                                | CGG CAC GGA TCC AAA ACT TTC TTT CAG CC          |
| PopZ XmaI For                                                 | GCA TTA CCC GGG ATG GCT CAG CCA AGT             |
| PopZ BamHi Rev                                                | GTC GCT GGA TCC GCG GCG CGA GCC GCG CGC CAC A   |
| Ldtp0845 NdeI for                                             | GCC TAC ATA TGT ACA GCG GCG ATA TAG CCG         |
| Ldtp0845 BamHI rev                                            | CGC TCG GAT CCT TAC TGC CAC ACC ACC ACA CG      |
| FtsW For AseI for                                             | GCA CGT ATT AAT ATG GTA AGC CGA GTT GAT CGC G   |
| FtsW Rev BamHI                                                | GCA CGT GGA TCC CTC CGC AGG AAC GCC GGA ACC G   |
| FtsZ <sub>AT</sub> GTPase Rev KpnI SacI (oEG827)              | GAT CGA GCT CGG TAC CGT CGA TGC CGG TGG CGA C   |
| FtsZ <sub>AT</sub> For NdeI (oEG789)                          | GAT CCA TAT GAC GAT ACA GCT GCA AAA G           |
| FtsZ <sub>AT</sub> Rev EcoRI (oEG1160)                        | GAT CGA ATT CTT AGT TGG ACT GGC GGC             |
| FtsZ <sub>1</sub> For SapI (oEG1132)                          | GAC TGC TCT TCT GGT ATG ACC CAG TCT CCG CG      |
| FtsZ <sub>1</sub> Rev BamHI (oEG1133)                         | GAC TGG ATC CTT AGT TAC GCA AGC CGG TG          |
| <i>Oligos for mutagenesis</i>                                 |                                                 |
| FtsZ <sub>AT</sub> -L72W (oEG1134)                            | GGC GTC AAC GTC ACC GAA GGT TGG GGC GCC GGT TC  |
| FtsZ <sub>1</sub> -L71W (oEG1135)                             | CTG ACC GGC GGC TGG GGC GCA GGC GCC             |
| <i>Primers for deletion vectors and deletion confirmation</i> |                                                 |
| FtsZ <sub>i</sub> P1                                          | GGA TCC CCT CTT CTT CCG CCT G                   |
| FtsZ <sub>i</sub> P2                                          | AAG CGC CCC GTC TTA TTC TCT TTC                 |
| FtsZ <sub>i</sub> P3                                          | TAA GAC GGG GCG CTT TCG CAG C                   |
| FtsZ <sub>i</sub> P4                                          | ACT AGT CCA TGG TCG AAC GGT TCG                 |
| FtsZ <sub>i</sub> P5                                          | CTA CGG CCT GAT CCA GCC                         |

|                                                                  |                                                       |
|------------------------------------------------------------------|-------------------------------------------------------|
| FtsZ <sub>i</sub> P6                                             | GTA CAT CAG CAC CAG CGC ATC                           |
| FtsZ <sub>i</sub> P1                                             | GCT GCA ACT AGT AAG TGG GGC ACG CAG GGC CAT           |
| FtsZ <sub>i</sub> P2                                             | AAG CAT GGT ACC GAA TTC GGA AGC CGA TCT CCT GGC AA    |
| FtsZ <sub>i</sub> P3                                             | GAA TTC GGT ACC ATG CTT TGA GTG AGA CAA CGT TCT A     |
| FtsZ <sub>i</sub> P4                                             | GCA CGT AAG CTT CCG GTC TTG CGG TCT TGT CC            |
| FtsZ <sub>i</sub> P5                                             | GAG CCA CCC CGA TTG CCG AAC                           |
| FtsZ <sub>i</sub> P6                                             | CTC ACG CGC TAT CGT GCG TTG                           |
| FtsZ <sub>AT</sub> P1                                            | GCA ACT AGT GAT CGC GAT CAA CCA TCG                   |
| FtsZ <sub>AT</sub> P2                                            | AAG CTT GGT ACC GAA TTC TTT ACC ATT CCT TCT TTC       |
| FtsZ <sub>AT</sub> P3                                            | GAA TTC GGT ACC AAG CTT AGG CGA TTC CAT ACG CTC       |
| FtsZ <sub>AT</sub> P4                                            | GCA GGA TCC GAT AGC GAA CGG CCG AGC                   |
| FtsZ <sub>AT</sub> P5                                            | AAT CGA AGA TGC GGA GAG                               |
| FtsZ <sub>AT</sub> P6                                            | AGG TTG TCG AGG CCC ATC                               |
| FtsA P1                                                          | GCA TAG ACT AGT GAA CTG TCG CTG ATC GAA               |
| FtsA P2                                                          | AAG CTT GGT ACC GAA TTC GAC GAT GTG GCT GCG CTT       |
| FtsA P3                                                          | GAA TTC GGT ACC AAG CTT GGA ATG TTT TCG CCG TTT GG    |
| FtsA P4                                                          | GCA TAG GGA TCC GCC GCC GCC CAT GCC GGC               |
| FtsA P5                                                          | CGA AGA CGG TGG AAG TTC GCC TG                        |
| FtsA P6                                                          | CGA TGC CCT GTT CGG CCA GAC                           |
| FtsW P1                                                          | GCT GCA ACT AGT GGA AAT TCG TGC CGG TCT CAA GTC       |
| FtsW P2                                                          | AAG CAT GGT ACC GAA TTC GGC CTC AGC CCC CTT TTC CAG   |
| FtsW P3                                                          | GAA TTC GGT ACC ATG CTT TAA ACG ATC ATG AAC AAG GGT A |
| FtsW P4                                                          | GCA CGT GGA TCC ACC GGA TTG CCG GTC GCA ACC GT        |
| FtsW P5                                                          | GAC GGT ATC CAG ACG CTT CGC GGC AGC CA                |
| FtsW P6                                                          | GGT CTC GCC CGT CTG TGA AGG CGT ATA G                 |
| <i>Primers for confirmation<br/>of Mini-Tn7 vector insertion</i> |                                                       |
| Tet forward                                                      | ACA TGT TGT ATA CCG GAA ACT GAT TGC AC                |
| Tn7R109                                                          | CAG CAT AAC TGG ACT GAT TTC AG                        |

## 2) SUPPLEMENTAL FIGURES

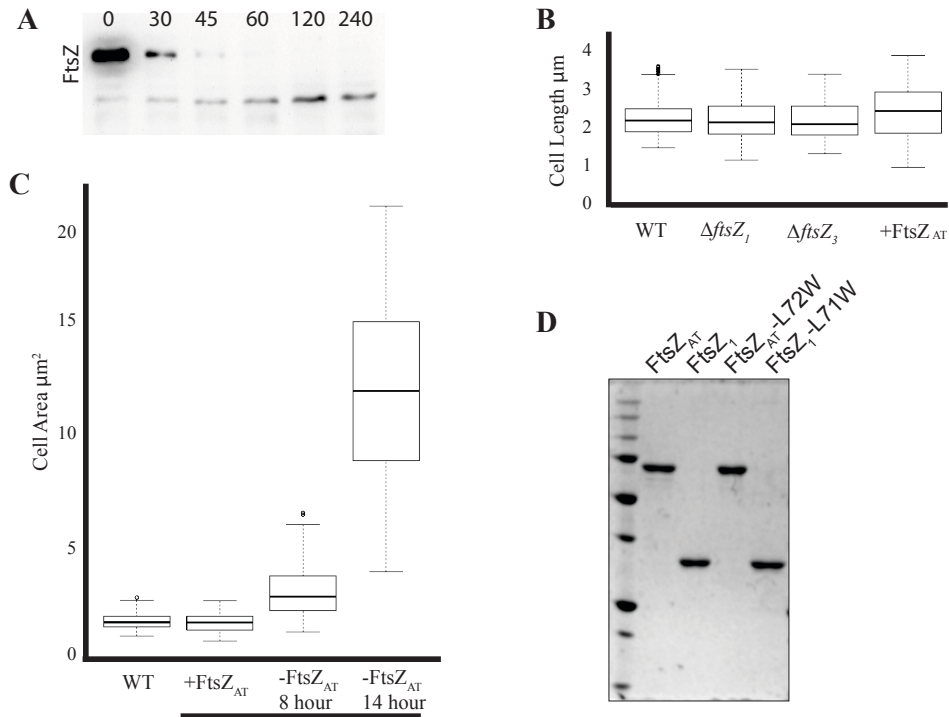

**Supplemental Figure 1. Cell growth and morphology of *ftsZ* mutants.** A.) Western blot analysis showing the depletion of FtsZ<sub>AT</sub> after the removal of inducer. B) Cell lengths of WT,  $\Delta ftsZ_1$ ,  $\Delta ftsZ_3$ , and induced *ftsZ*<sub>AT</sub> are indistinguishable. C) Cell area in WT and induced *ftsZ*<sub>AT</sub> are the same while cells depleted of FtsZ<sub>AT</sub> for 8 and 14 hours accumulate cell area. D) Coomassie Blue stained protein gel showing the purification of FtsZ<sub>AT</sub>, FtsZ<sub>1</sub>, FtsZ<sub>AT</sub>-L72W, and FtsZ<sub>1</sub>-L71W.

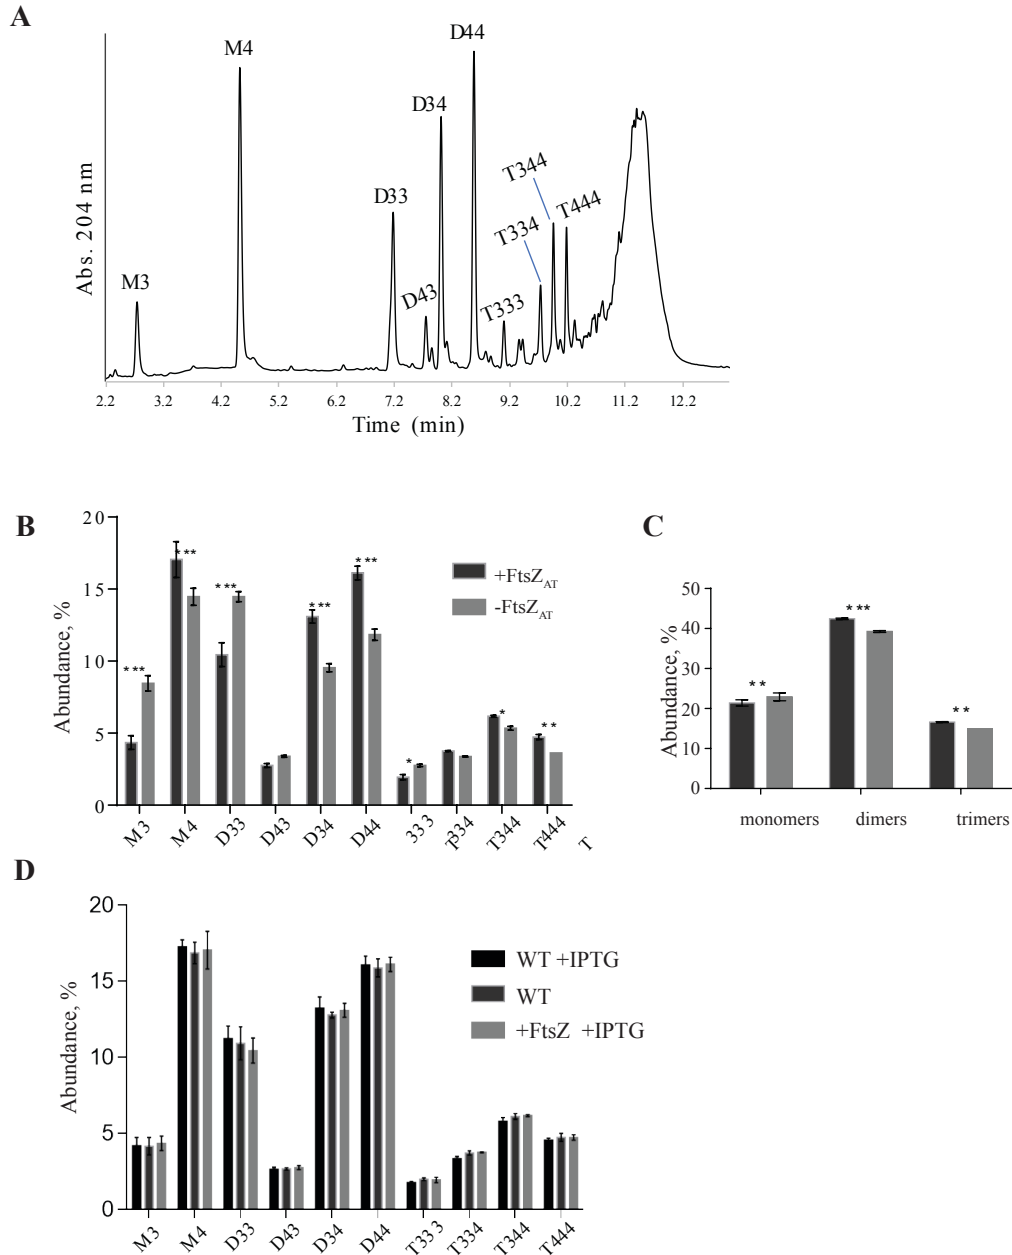

**Supplemental Figure 2. Peptidoglycan analysis of WT and *ftsZ* depletion strains.** A) UPLC spectra of mucopeptides derived from WT cells. Major mucopeptides are labeled. M= monomers, D= dimers, T= trimers. Numbers indicate the length of the mucopeptide stems and the position of crosslink in dimers and trimers. B) Quantitation of the major mucopeptide peaks in *ftsZ*<sub>AT</sub> depletion strain induced (black) and depleted for 14 hours (gray). C) Abundance of total monomers, dimers, and trimers in the mucopeptide profile in *ftsZ*<sub>AT</sub> depletion strain when induced (black) and after 14 hours of depletion (gray). D) Quantitation of the major mucopeptide peaks in WT with IPTG (black), WT without IPTG (black with gray outline), and *ftsZ*<sub>AT</sub> depletion strain induced with IPTG (gray). Data shown is the average abundance of each mucopeptide and is taken from analysis of three independent biological samples. Statistical significance is indicated with an asterisk.



### 3) SUPPLEMENTAL MOVIE LEGENDS

**Movie 1. Growth and morphological changes during FtsZ<sub>AT</sub> depletion.** Cells were washed to remove inducer and grown in liquid ATGN for 4 hours before spotting on an ATGN pad. Images were acquired every ten minutes and movie is played at 10 frames per second for a total of 145 frames.

**Movie 2. Growth and morphological changes during FtsA depletion.** Cells were washed to remove inducer and grown in liquid ATGN for 2 hours before spotting on an ATGN pad. Images were acquired every ten minutes and movie is played at 10 frames per second for a total of 97 frames.

**Movie 3. Growth and morphological changes during FtsW depletion.** Cells were washed to remove inducer and grown in liquid ATGN for 4 hours before spotting on an ATGN pad. Images were acquired every ten minutes and movie is played at 10 frames per second for a total of 85 frames.

### 4) SUPPLEMENTAL REFERENCES

- Bendezu, F.O., Hale, C.A., Bernhardt, T.G., and de Boer, P.A. (2009) RodZ (YfgA) is required for proper assembly of the MreB actin cytoskeleton and cell shape in *E. coli*. *The EMBO journal* **28**: 193-204.
- Choi, Y.J., Morel, L., Le Francois, T., Bourque, D., Bourget, L., Groleau, D., Massie, B., and Miguez, C.B. (2010) Novel, versatile, and tightly regulated expression system for *Escherichia coli* strains. *Applied and environmental microbiology* **76**: 5058-5066.
- Figuroa-Cuilan, W., Daniel, J.J., Howell, M., Sulaiman, A., and Brown, P.J. (2016) Mini-Tn7 Insertion in an artificial *attTn7* site enables depletion of the essential master regulator CtrA in the phytopathogen *Agrobacterium tumefaciens*. *Applied and environmental microbiology* **82**: 5015-5025.
- Howell, M., Aliashkevich, A., Salisbury, A.K., Cava, F., Bowman, G.R., and Brown, P.J.B. (2017) Absence of the polar organizing protein PopZ results in reduced and asymmetric cell division in *Agrobacterium tumefaciens*. *Journal of bacteriology* **199**.
- Khan, S.R., Gaines, J., Roop, R.M., 2nd, and Farrand, S.K. (2008) Broad-host-range expression vectors with tightly regulated promoters and their use to examine the influence of TraR and TraM expression on Ti plasmid quorum sensing. *Applied and environmental microbiology* **74**: 5053-5062.
- Simon, R., Priefer, U., and Puhler, A. (1983) A broad host range mobilization system for in vivo genetic engineering: transposon mutagenesis in gram negative bacteria. *Bio/Technology* **1**: 784.
- Thanbichler, M., Iniesta, A.A., and Shapiro, L. (2007) A comprehensive set of plasmids for vanillate- and xylose-inducible gene expression in *Caulobacter crescentus*. *Nucleic Acids Res* **35**: e137.
- Watson, B., Currier, T.C., Gordon, M.P., Chilton, M.D., and Nester, E.W. (1975) Plasmid required for virulence of *Agrobacterium tumefaciens*. *Journal of bacteriology* **123**: 255-264.
